# Supplementary material
Source: Research Square preprint supplement (doi:10.21203/rs.3.rs-9558181/v1)
Supplement: Supplementary file 1 [file 07097458e7db07c9241e5dfc.docx]

**Supplementary Material**

**Microglia-to-Neuron Mitochondrial Transfer Supports Neuronal Metabolism and Protects Against Neurodegeneration**

Monara Kaélle Sérvulo Cruz Angelim1*; Lincon Felipe Lima Silva1; Gisele Castro1; Wilias Silva Santos Greison1; Rodrigo Dias Requião1, Guilherme Augusto da Silva Nogueira2, Thiago Pereira Campos3, Célia Bresil1, Mariana Ozello Baratti4, Webster Leonardo Guimarães da Costa1, Matheus Barbosa1, Francisco Breno Silva Teófilo5, Hernandes F. Carvalho5, Lício A. Velloso6, Pedro M. Moraes-Vieira1,6,7*

1 Laboratory of Immunometabolism, Institute of Biology, University of Campinas, São Paulo, Brazil

2 Cell Signaling Laboratory, School of Medical Sciences, University of Campinas, São Paulo, Brazil

3 Physics Department, Federal University of Ceará, Fortaleza, Ceará, Brazil

4 Institute of Biology, University of Campinas, São Paulo, Brazil

5 Extracellular Matrix and Gene Expression Regulation Laboratory, University of Campinas, São Paulo, Brazil

6 Obesity and Comorbidities Research Center (OCRC), Campinas, São Paulo, Brazil.

7 Experimental Medicine Research Cluster (EMRC), Campinas, São Paulo, Brazil.

** Corresponding authors:* [monara.kaelle@gmail.com](mailto:monara.kaelle@gmail.com); [pmvieira@unicamp.br](mailto:pmvieira@unicamp.br)

**

**

**Supplementary Figure 1. Microglia release mitochondria upon contact with neuronal cells.**

**(A)** Representative images of co-cultures between Dendra2+ primary microglia and different neuronal cell types: Clu189 cells, primary neurons, and the Neuro2a cell line. Images are shown as merge, Dendra2 channel (green), and brightfield. Numerous extracellular Dendra2+ mitochondrial particles are detected in the Dendra2 channel, indicating mitochondrial release by microglia in the presence of neuronal cells.

**(B)** Validation of cell identity in culture. Clu189 neuronal cells are positive for the neuronal marker MAP2 (red). Primary microglia are positive for the microglial marker Iba1 (magenta).

**

**

**Supplementary Figure 2. Quantification of mitochondrial morphology and validation of gene knockdown.**

**(A)** Representative confocal images of Dendra2-labeled mitochondria (green) in microglia under different stimulation conditions (Naïve, Palmitate, LPS O111:B4, and Mdivi-1 + M1), with nuclei stained with DAPI (blue). Quantification of mitochondrial morphology was performed using the Mitochondrial Analyzer plugin in ImageJ/FIJI.

**(B)** Representative images and quantitative analysis of mitochondrial morphology in microglia treated with LPS O55:B5 compared to naïve control. LPS O55:B5 induces greater mitochondrial fragmentation than LPS O111:B4, as indicated by reduced branch number, branch length, and junctions, with a trend toward increased mitochondrial count per cell.

**(C)** qPCR validation of CRISPR-Cas9–mediated knockdown of candidate genes in Clu189 neurons. Gene expression levels are shown as fold change relative to control (GFP-targeting guide RNA).

Statistical analysis: unpaired t-test; *p* < 0.05.

**Supplementary Figure 3. Isolated microglia-derived mitochondria are internalized by neurons and modulate neuronal metabolism and gene expression.**

**(A)** Transmission electron microscopy (TEM) image of mitochondria isolated from primary microglia, confirming intact mitochondrial ultrastructure (upper panel). Western blot analysis of mitochondrial proteins (NDUFS1, UQCRC2, TOMM20) in isolated mitochondrial fractions, microglial supernatants, and whole microglial lysates following the indicated stimuli (Ctrl, BSA/Palm, LPS, Mdivi-1 + M1). Mitochondrial proteins are enriched in the isolated mitochondrial fraction compared to supernatant controls (lower panel).

**(B)** Representative confocal images of Clu189 neurons incubated with isolated microglia-derived mitochondria (Dendra2+, green). Nuclei are stained with DAPI (blue) and F-actin with phalloidin (magenta). 3D reconstruction (panel b; top-down and orthogonal views) confirms intracellular localization of Dendra2+ mitochondria within neuronal somata.

**(C)** Seahorse extracellular acidification rate (ECAR) analysis of Clu189 neurons treated with vehicle or rotenone and supplemented with mitochondria isolated from microglia exposed to the indicated stimuli. Glycolysis and glycolytic capacity are expressed as fold change relative to vehicle-treated control neurons.

**(D)** Flow cytometry analysis of mitochondrial ROS using MitoSOX in undifferentiated Clu189 neurons co-cultured with microglia under the indicated conditions.

**(E)** Amplex Red assay measuring H₂O₂-derived fluorescence in differentiated Clu189 neurons treated with isolated microglia-derived mitochondria (microglia:neuron ratio 2:1). Data are expressed as fold change relative to control (Clu189 vehicle treated with no mitochondria).

**(F)** qPCR analysis of AgRP (Clu189 neurons) and POMC (POMC neuronal lineage) gene expression following treatment with isolated microglia-derived mitochondria under vehicle or rotenone conditions.

**(G)** qPCR analysis of TNF-α expression in AgRP and POMC neuronal lineages after exposure to microglia-derived mitochondria.

Statistical analysis: unpaired t-test or one-way ANOVA as appropriate; data represent mean ± SEM; *p* < 0.05.

**
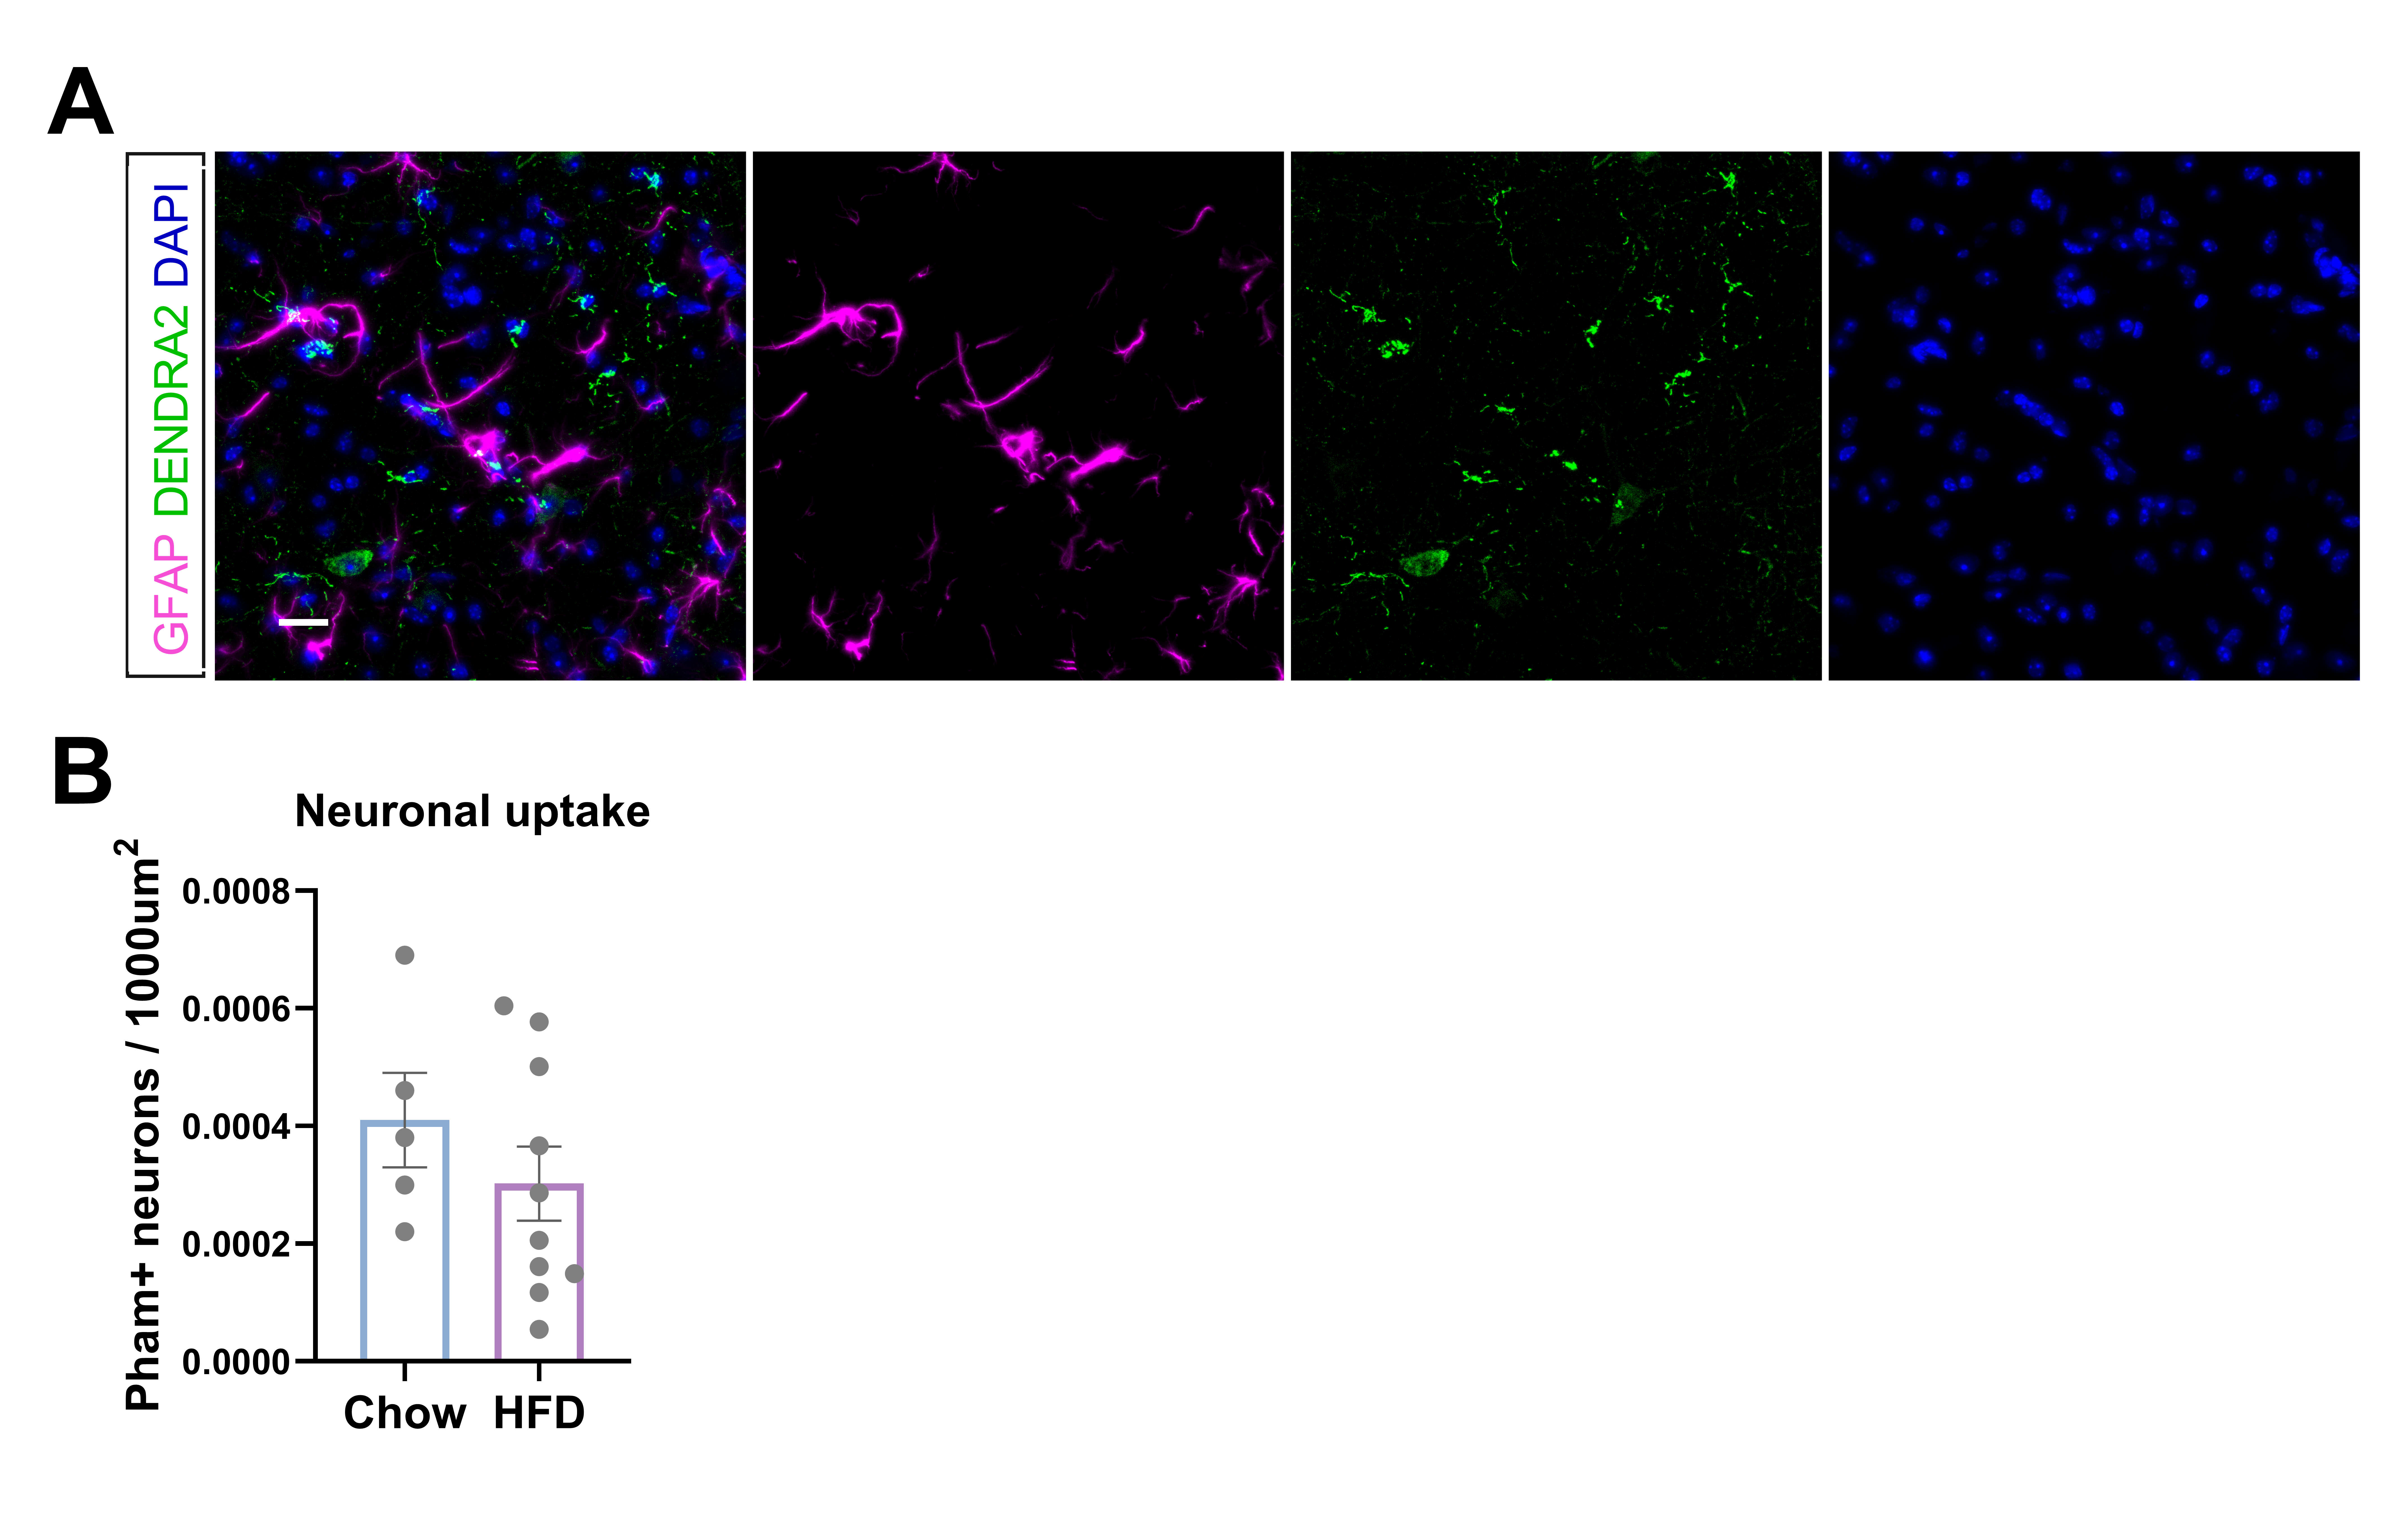
**

**Supplementary Figure 4. Astrocytes do not internalize microglia-derived mitochondria in the arcuate nucleus.**

**(A)** Representative confocal images of the arcuate nucleus from LyzM-CrePham+ mice showing astrocytes labeled with GFAP (magenta), microglia-derived Dendra2+ mitochondria (green), and nuclei stained with DAPI (blue). Dendra2+ mitochondrial signal is not detected within GFAP+ astrocytes, indicating lack of mitochondrial uptake by astrocytes in this region.

**(B)** Quantification of Dendra2+ neuronal uptake in the VMH of mice fed either chow diet or HFD. Data are expressed as mean ± SEM. N = 5–10 animals per group. Statistical analysis: unpaired t-test.

**Video S1C. Microglia release mitochondria-containing vesicles during co-culture with stressed neurons.**

Time-lapse confocal imaging of a Dendra2+ primary microglial cell co-cultured with rotenone-stimulated Clu189 neurons. Over approximately 3 h of imaging, the microglial cell releases a vesicular structure containing Dendra2-labeled mitochondria into the extracellular space. Dendra2 signal is shown in green. Time indicated in hh:mm:sec format.

**Video S2C. Neuronal process-mediated capture of extracellular mitochondria.**
Time-lapse imaging of a Clu189 neuron (brightfield) interacting with a naked Dendra2+ mitochondrion (green). The neuron extends a projection toward the extracellular mitochondrion and subsequently retracts the process, drawing the mitochondrion closer to the neuronal soma. Time indicated in hh:mm:sec format.
